# Supplementary material for: Outcomes of the resuscitative and emergency thoracotomy at a Dutch level-one trauma center: are there predictive factors for survival?
Source: Springer Nature journal article supplement (doi:10.1007/s00068-022-02021-x), 2022-06-17
Supplement: MOESM1 [file 23176894]

**Appendix 1 Laboratory results of patients who underwent an resuscitative or emergency thoracotomy**

| <b>Laboratory results upon arrival hospital</b>                                                    | <b>Total<br/>n = 56 (100%)</b>    | <b>Survived first 30<br/>days<br/>n = 18 (32%)</b> | <b>Deceased within<br/>first 30-days<br/>n = 38 (68%)</b> | <b>Resuscitative<br/>thoracotomy<br/>n = 45 (80%)</b> | <b>Emergency<br/>thoracotomy<br/>n = 11 (20%)</b> |
|----------------------------------------------------------------------------------------------------|-----------------------------------|----------------------------------------------------|-----------------------------------------------------------|-------------------------------------------------------|---------------------------------------------------|
| Hemoglobin in mmol/L <sup>a</sup> , median (IQR)<br>< 7.4 mmol/L, n (%)                            | 7.2 (5.5 – 8.1)<br>28 (56)        | 7.8 (6.0 – 8.6)<br>8 (29)                          | 7.0 (5.1 – 7.6)<br>20 (71)                                | 7.2 (5.1 – 8.0)<br>22 (79)                            | 7.1 (6.1 – 8.6)<br>6 (21)                         |
| Hematocrit in % <sup>b</sup> , median (IQR)<br><36%, n (%)                                         | 34 (26 – 39)<br>28 (57)           | 37 (29 – 41)<br>7 (25)                             | 34 (24 – 38)<br>21 (75)                                   | 34 (24 – 38)<br>23 (82)                               | 36 (29 – 41)<br>5 (18)                            |
| Leukocytes in x10 <sup>9</sup> /L <sup>c</sup> , median (IQR)<br>>10 x10 <sup>9</sup> /L, n (%)    | 12 (8 – 19)<br>23 (62)            | 15 (11 – 19)<br>13 (57)                            | 10 (6 – 18)<br>10 (43)                                    | 12 (7 – 18)<br>16 (70)                                | 15 (11 – 20)<br>7 (30)                            |
| Thrombocytes in x10 <sup>9</sup> /L <sup>d</sup> , median (IQR)<br><150 x10 <sup>9</sup> /L, n (%) | 149 (113 – 237)<br>20 (50)        | 211 (154 – 277)<br>4 (20)                          | 122 (82 – 159)<br>16 (80)                                 | 131 (112 – 211)<br>15 (75)                            | 174 (119 – 269)<br>5 (25)                         |
| PT in seconds <sup>e</sup> , median (IQR)<br>>13 seconds, n (%)                                    | 22 (15 – 34)<br>29 (85)           | 16 (13 – 22)<br>10 (34)                            | 27 (17 – 57)<br>19 (66)                                   | 22 (17 – 35)<br>22 (76)                               | 16 (15 – 23)<br>7 (24)                            |
| aPTT in seconds <sup>f</sup> , median (IQR)<br>>34 seconds, n (%)                                  | 53 (36 – 111)<br>25 (76)          | 33 (30 – 42)<br>6 (24)                             | 72 (54 – 120)<br>19 (76)                                  | 60 (38 – 120)<br>20 (80)                              | 36 (30 – 74)<br>5 (20)                            |
| pH <sup>g</sup> , median (IQR)<br><7.37, n (%)                                                     | 7.06 (6.95 – 7.32)<br>42 (89)     | 7.33 (7.09 – 7.37)<br>12 (29)                      | 7.00 (6.87 – 7.15)<br>30 (71)                             | 7.03 (6.95 – 7.20)<br>35 (83)                         | 7.33 (7.11 – 7.38)<br>7 (17)                      |
| Bicarbonate in mmol/L <sup>g</sup> , median (IQR)<br><22 mmol/L, n (%)                             | 17 (12 – 22)<br>35 (74)           | 19 (16 – 22)<br>10 (29)                            | 14 (11 – 21)<br>25 (71)                                   | 16 (11 – 21)<br>29 (83)                               | 20 (16 – 23)<br>6 (17)                            |
| Base deficit in mmol/L <sup>h</sup> , median (IQR)<br>>3 mmol/L, n (%)<br>>15 mmol/L, n (%)        | 11 (4 – 19)<br>37 (80)<br>15 (33) | 8 (4 – 14)<br>12 (32)<br>1 (7)                     | 15 (7 – 21)<br>25 (68)<br>14 (93)                         | 14 (7 – 20)<br>30 (81)<br>13 (87)                     | 6 (3 – 11)<br>7 (19)<br>2 (13)                    |
| Lactate in mmol/L <sup>e</sup> , median (IQR)<br>>2.2 mmol/L, n (%)                                | 7.7 (4.2 – 10.9)<br>32 (94)       | 6.1 (4.4 – 10.4)<br>13 (41)                        | 9.3 (3.9 – 15.0)<br>19 (59)                               | 9.3 (4.4 – 13)<br>25 (78)                             | 5.2 (4.2 – 6.5)<br>7 (22)                         |
| pCO2 in mmHg <sup>g</sup> , median (IQR)<br>>45 mmHg, n (%)                                        | 49 (42 – 61)<br>30 (64)           | 42 (35 – 56)<br>7 (41)                             | 56 (45 – 65)<br>23 (74)                                   | 52 (44 – 63)<br>25 (83)                               | 43 (34 – 50)<br>5 (17)                            |
| Potassium in mmol/L <sup>b</sup> , median (IQR)<br>>5.0 mmol/L, n (%)                              | 4.1 (3.6 – 5.3)<br>15 (31)        | 3.6 (3.5 – 4.0)<br>0 (0)                           | 4.9 (3.8 – 6.6)<br>15 (100)                               | 4.4 (3.6 – 6.1)<br>15 (100)                           | 3.6 (3.5 – 3.9)<br>0 (0)                          |

Abbreviations: aPPT = Activated Partial Thromboplastin Time; IQR = Interquartile Range; PT = Prothrombin Time.  
Missing variables: <sup>a</sup> 6 missing; <sup>b</sup> 7 missing; <sup>c</sup> 19 missing; <sup>d</sup> 16 missing; <sup>e</sup> 22 missing; <sup>f</sup> 23 missing; <sup>g</sup> 9 missing; <sup>h</sup> 10 missing.  
\*References values: Hemoglobin 7.4 – 9.6 mmol/L, Hematocrit 36 – 46%, Leukocytes 4.0 – 10.0 x10<sup>9</sup>/L, Thrombocytes 150 – 450 x 10<sup>9</sup>/L, PT 10-13 seconds, aPTT 24 – 34 seconds, pH 7.37 – 7.45, Bicarbonate 22 – 29 mmol/L, Base deficit -3.0 – 3.0 mmol/L, Lactate 0.0-2.2 mmol/L, pCO2 35 – 45 mmHg, Potassium 3.8 – 5.0 mmol/L.
